# Supplementary material
Source: publisher figshare collection journal article supplement (https://frontiersin.figshare.com/ndownloader/files/24560318)
Supplement: Supplementary file 1 [file 24560318]

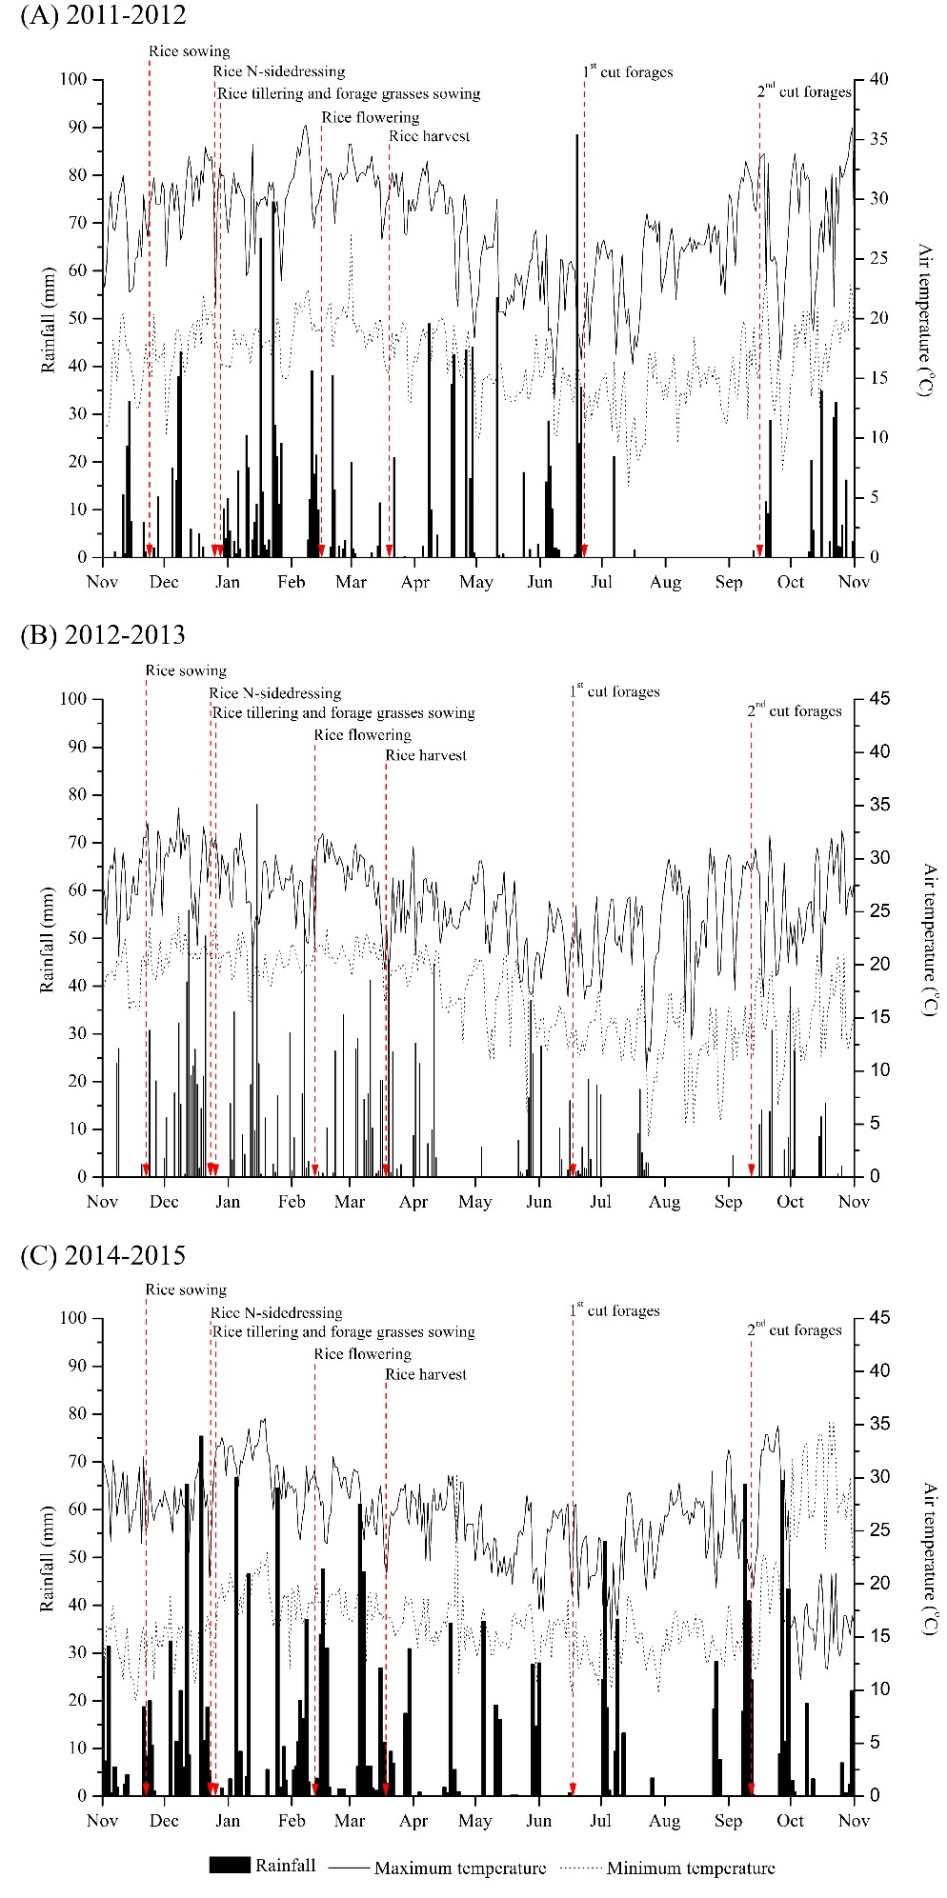


# Supplementary Fig. 1. Daily rainfall (bars) and maximum and minimum temperatures (lines) at Botucatu, São Paulo State, Brazil, during the study periods in 2011-2012 (A), 2012-2013 (B) and 2014-2015 (C) growing seasons, and times of main events in the experiments.


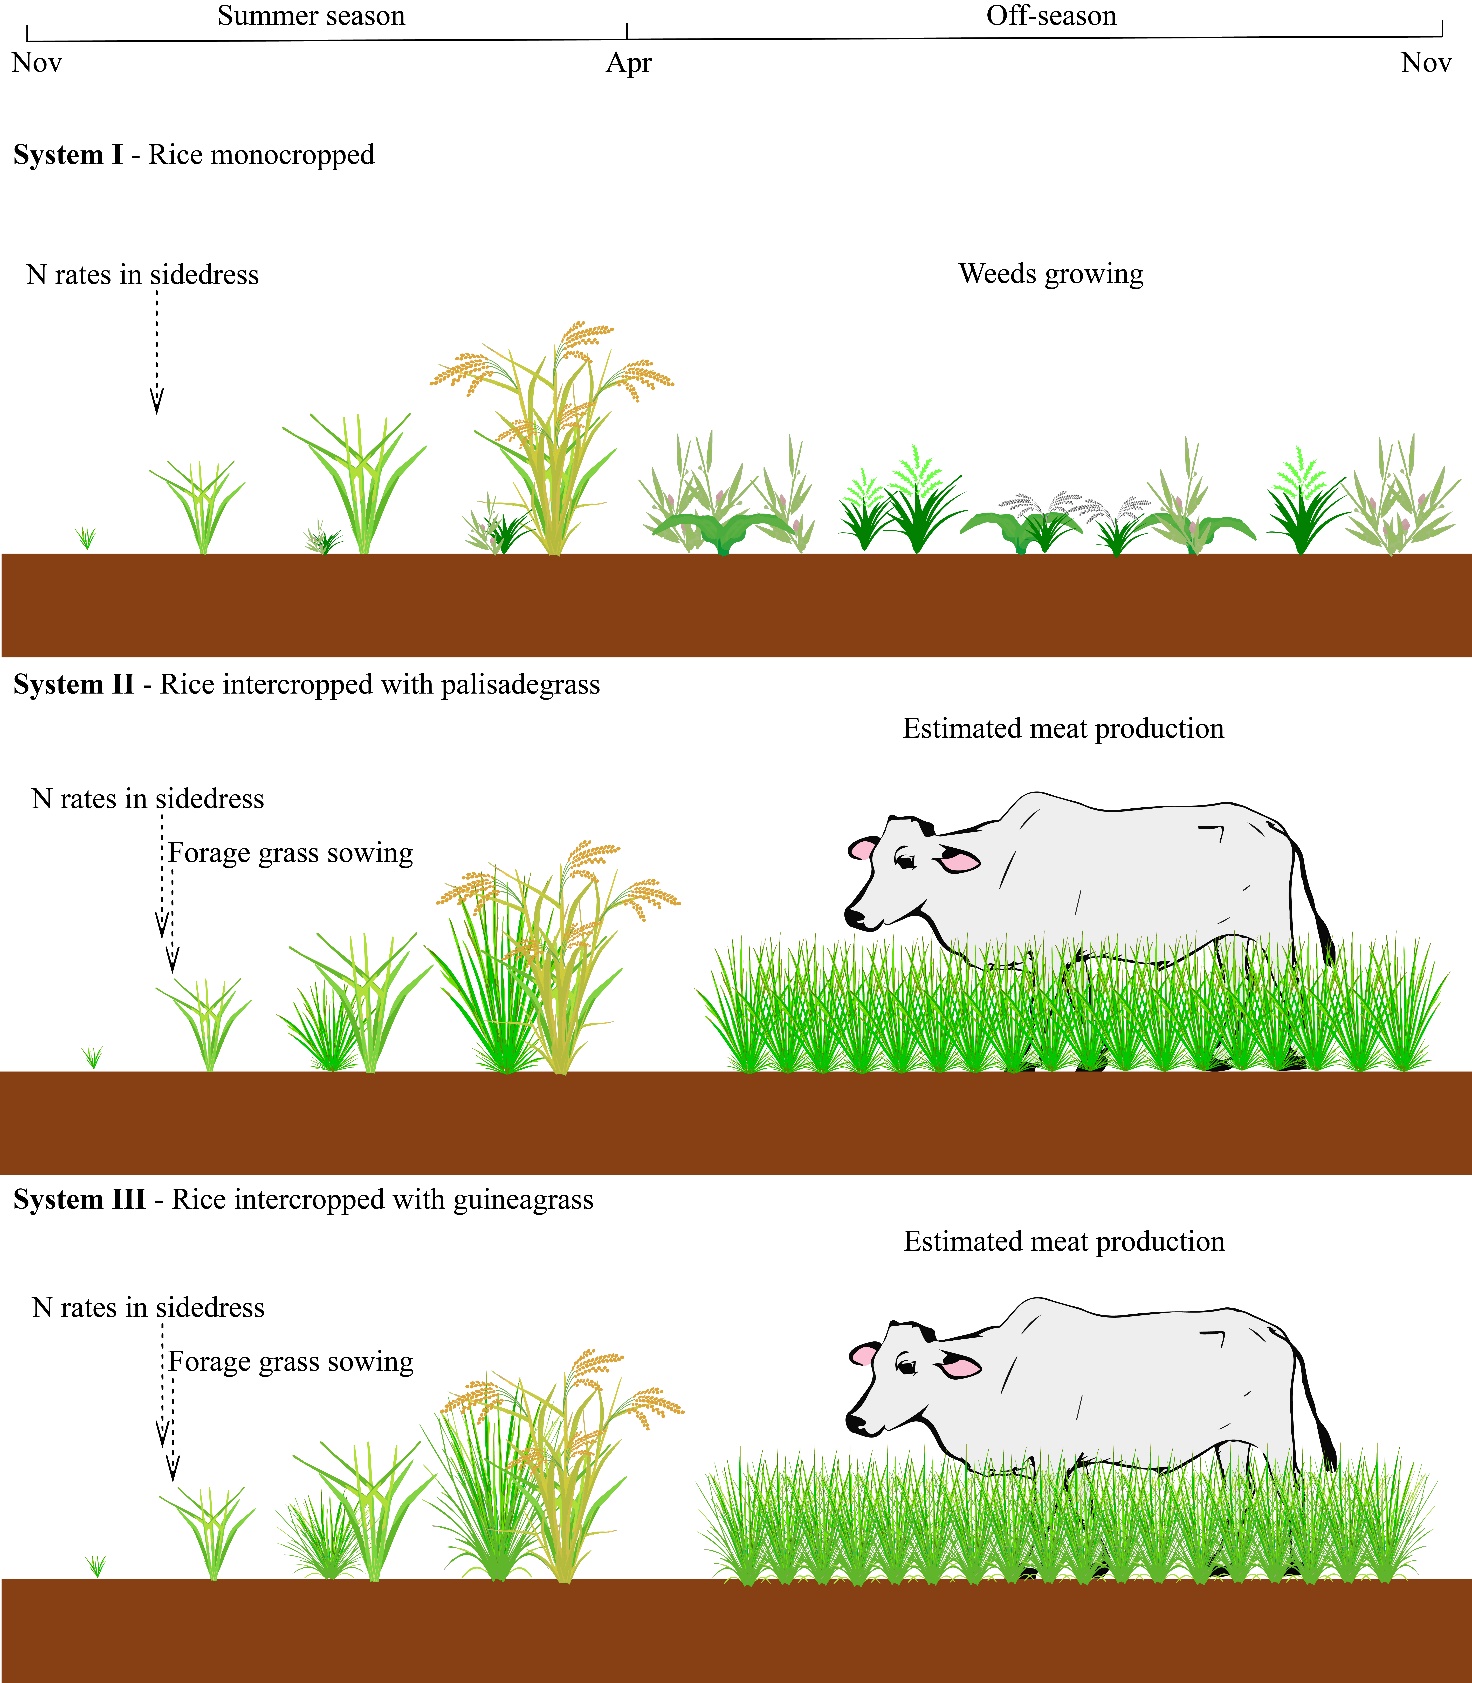


# Supplementary Fig. 2. Schematic diagram of N management on three cropping systems during the study periods in 2011-2012, 2012-2013 and 2014-2015 growing seasons.
